# Supplementary material for: Activating a patient-relevant mutation of a genetically defined heart disease in a humanized pig model
Source: Research Square preprint supplement (doi:10.21203/rs.3.rs-7194258/v1), 2025-09-26
Supplement: Supplementary file 1 [file b5edb9b01e96aa083907d1dc.docx]

**Supplementary Material**

***Table of content*** *page*

*Supplementary Methods* 2

*Oligo and construct sequences* 10

*References* 16

**Regulatory statement**

Work on blood or tissue samples of PLN-R14del patients was done at UMC Utrecht, under ethical regulations of the university.

Animal work has been conducted under the supervision of the responsible regulatory authorities: the Regierung von Oberbayern has approved animal experiments involving somatic cell nuclear transfer, maintenance of pigs and longitudinal monitoring at LMU Munich under the file number AZ 55.2-2532.Vet_02-17-136 and 55.2-2532.Vet_02-22-92. The State Veterinary Administration of the Czech Republic approved animal experiments on maintenance, sub-retinal intervention and longitudinal monitoring at IAPG Libechov under the experimental protocol number 75/2019.

**Bioinformatics evaluation:**

Protein sequences for mammalian PLN, SERCA1 and SERCA2 were extracted from GenBank (ncbi.nlm.nih.gov). The genomic locus of mammalian PLN was identified using methods described previously (Grotz et al., 2022). In brief, BLAT search using human sequences of the PLN exons and the adjacent CEP85L exons was performed on the reference genome of macaque, marmoset, cattle, sheep, pig, horse, cat, dog, rabbit, mouse, and rat (www.ensembl.org). The respective contig sequencese were extracted aligned by a combination of DiAlign and CHAOS (Brudno et al., 2004). Proposed regulatory elements were extracted from the USCS Genome browser (genome.ucsc.edu) as DNase sensitive elements (Thurman et al., 2012), ENCODE ChIP-Chip (Wang et al., 2013), FANTOM5 enhancer elements (Andersson et al., 2014), GeneHancer elements (Fishilevich et al., 2017), FAIRE ENCODE regions (Giresi et al., 2007) and PreMod (Ferretti et al., 2007). Any identified regulatory element was localized within the alignment in BioEdit (https://bioedit.software.informer.com/7.2/) and a density plot was created. Both, a homology plot at nucleic acid level and a protein conservation plot were calculated in BioEdit on the basis of the nucleotide summary assessement and entropy calculation functions, respectively. Coverage maps of the augmented alignment were plotted by JalView (Waterhouse et al., 2009).

**Targeting construct:**

BLAT search has annotated the porcine PLN gene to pig chr1:43.5Mb, embedded within the CEP85L gene, with identified exon corresponding GenBank no. NM_214213.1. According to bioinformatics assessment, humanization was planned to comprise the entire PLN exon 2 (2882nt) plus 507nt of the upstream intronic region and 501 bp downstream region. 2 separate components were synthesized (BioCat gene synthesis service, Heidelberg, Germany) and assembled to the full modification vector by plasmid cloning. One element constituted a 5´-arm for bacterial recombineering (300bp), *Nsi*I, *Nhe*I, *BamH*I and *Spe*I restriction enzyme sites, a loxP site as well as a human sequence comprising the 2879nt of a defective PLN exon 2, including the causative PLN c.40_42delAGA mutation and the disease-allele specific SNPs (rs12198461 T>G, rs1051429 C>T), plus 507nt upstream intronic and 501nt downstream sequences. *Not*I sites were placed at both sides of the constructs. Another element carried a the 688 nt of intact human PLN-WT sequence localized between the naturally occurring and unique *Avr*IIand *Pst*I sites. By bacterial cloning, we first constituted a full huPLN-WT cassette by replacing the defective PLN-R14del fragment between the *Avr*II/*Pst*I sites by the corresponding PLN-WT fragment. From this plasmid, an NsiI – huPLN-WT – SpeI fragment was excised and co-ligated with an NheI – neo-loxP – BamHI fragment into an NsiI-BamHI linearized huPLN-R14del plasmid. After verifying the finalized vector by digest pattern and sequencing, the entire modification element was excised by *NotI* and integrated into the porcine BAC CH242-318M5 (BACPAC Genomics, Emeryville, CA, USA), covering the pig PLN gene, by bacterial recombineering in bacterial strain SW106 (Warming et al., 2005). Correct modification of the BAC was confirmed according to established procedures (Auch et al., 2022). This combined i) end-point PCR spanning across the homologous arms, ii) BAC fingerprint pattern after *Nco*I, confirming the correct localization of the modification and iii) partial sequencing of critical regions on the BAC using primers huPLNup1r, huPLNf2, huPLNdo1f, neokanR and neokanF.

**Gene Targeting and F0 founder pig generation:**

CRISPR/Cas gRNA: To stimulate homologous recombination of the modified BAC vector with the target site in pig primary kidney cell (PKC) lines (Richter et al., 2012), CRISPR/Cas-mediated double strand breaks were desired. For this, the proposed target site in several PKC lines was amplified with the primer pair poPLN1f-poPLN1r (1526bp) and sequenced with primers poPLN5s and poPLN6s for naturally occuring SNP. 3 gRNAs, pln-BACg1, PLN-BACg2 and PLN-BACg3, were tested for their capacity to induce non-homologous end-joining (NHEJ) mutations 48 hours after nucleofection (Vochozkova et al., 2019), using the ICE CRISPR analysis tool of Sanger electropherograms (https://www.synthego.com/products/ bioinformatics/analysis).

PKC genetic modification: The high-potential cell line PKCf (Grotz et al., 2022; Klymiuk et al., 2012) was co-nucleofected with the modified BAC (4200ng), plasmids expressing pln-BACg1 and pln-BACg3 under U6 promoter control (both 1225ng) and a plasmid encoding Cas9 (1750ng) in a 2b nucleofector (Amaxa by Lonza, Basel Switzerland). Single cell clones (SCC) were generated by seeding 100 cells per half area 96-well plates and selection with G418 (Richter et al., 2012) and propagated towards a 2x 96-well scale. One aliquot was used for analysis by the loss-of-wildtype-allele approach (LoWA) (Vochozkova et al., 2019) and the other served as a backup for potential SCNT. qPCR was carried out on a LightCycler96 (Roche Life Science, Basel, Switzerland) using FastStart Essential DNA Green Master (Roche Life Science) and primer pair poPLN_q3f – poPLN_q3r as well as the primer pair ush1c_qf1 – ush1c_qr1for a reference site in the POU5F1 gene and ng_qf6 – ng_qr4 for a second reference in the NANOG gene. Then candidate SCC were examined by sequencing endpoint PCR amplicons, using poPLN1f-poPLN1r (1526bp) primers to detect the pig PLN-WT allele, huPLNdoF-neokanR (527bp) and huPLN2F-huPLN1r (630 or 633bp) primers to detect the human PLN WT as well as R14del exon 2 and resistance cassette.

Cre-treatement of SCC and SCNT: Aiming at activating the huR14del cassette in parts of the cell, SCC were treated in 2 different ways. Either, backup portions of verified clones were recovered from cryopreservation by seeding onto two 96-wells and one portion was nucleofected with 0.4 µg Cre-expressing plasmid, using the Nucleofector 2b device, mixed with 250 µl culture medium, and seeded onto 96-well format to recover and cryo-conserved as a single aliquot.This aliquot was then thawed and processed for SCNT as previously described (Kurome et al., 2015). The second aliquot was propagated to yield 3 further portions, each representing a fully confluent 96-wells, and cryo-conserved. Alternatively, SCC backup portions were thawed and seeded on 2 96-half well plates and cryo-conserved. During preparation for SCNT, cells were thawed, starved for 48h and the lipofected with 150 ng Cre mRNA (TransMessenger Lipofection kit (Qiagen, Hilden, Germany) in a proportion of RNA : Transfection Reagent = 1:7.

SCNT into enucleated oocytes and embryos transfer into synchronized gilts, was performed according to standard procedures (Kurome et al., 2015). Birth of founder animals was introduced in pregnant foster mothers by Estrumate at day 115. (MSD Animal Health, Merck, Kenilworth, NJ; USA).

**Breeding, porcine zygote culture and microinjection:**

After reaching fertility PLN F0 sows were inseminated with WT sperm. F1 offspring were genotyped and raised for breeding purposes or selected for AAV-Cre treatment (see below). After reaching fertility, one huPLN-WT boar was used to inseminate synchronized gilts for ovary flushing. For this, estrus was synchronized in Libechov minipigs pigs by Regumate feeding (dosing??? Jensen) for 15 days. For superovulation, minipig gilts were stimulated with 500 IU of PMSG (Life-gene) 44 h after the last dose of Regumate. 84 hours after pregnant mare's serum gonadotropin (PMSG, Life-gene) injection, minipig gilts were stimulated with 500 IU of human Chorionic Gonadotropin (hCG). The next day, the gilts were inseminated two times after estrus detection. Zygotes were collected by flushing the oviducts of inseminated gilts with prewarmed PBS at least twice. Collected zygotes were washed in M2 medium (M7167, Merck) and transferred to culture media. Embryos were cultured in a Defined Medium for Porcine Embryos (PZM-5, CSR-CK024, Cosmo Bio), supplemented with 1 mg/ml bovine serum albumin (Merck) at 39°C with 5% CO2 and 5% O2. Zygotes were microinjected in M2 medium with approximately 10 pl of a 10 ng/ul StemMACS™ Cre Recombinase mRNA (130-101-113, Miltenyi Biotec) using a PM2000B microinjector (MicroData Instrument). mRNA for micro-injection was prepared according to the manufacturer's protocol and stored at -80°C. For in vitro assessment and embryo transfer, embryos were cultured in 50-μl culture media microdrops covered with mineral oil (Ovoil, Vitrolife).

**Laparoscopic transfer of the micromanipulated embryos (MME)**

Laparoscopic transfer of MME was done in general anesthesia (number of project of experiment 4190/2023). For introduction of sedation the minipigs were intramuscularly injected a combination of agents: tiletamine 2 mg/kg + zolazepam 2 mg/kg (Zoletil 100, Virbac) + ketamine 2 mg/kg (Narketan 10, Chassot) + xylazine 0.4 mg/kg (Rometar 2%, Spofa). During anesthesia the monitoring of heart rate (HR) and oxygen saturation (SpO2) was done. For animal’s analgesia in time of MME laparoscopic transfer we injected Tramal (max. 400mg/animal/day). Under deep sedation, the animals were intubated and we started to breathe them artificially by anaesthetic machine (1L/minute oxygen + 1L/minute air) under Isoflurane (ISOFLURIN 1000 mg/g - Alvetra Werfft) anaesthesia 1.5%. After shaving, cleaning and disinfection of skin in abdomen region of animals by braunol solution (B.Braun) we made a small (cca 1-2 cm) incision in place of umbilicus through the skin and subcutis by scalpel. Then a Veress needle was inserted through the incision into the abdomen cavity and CO2 insufflation was done to 12 mm Hg pressure. Next the Veress needle we changed by laparoscopic trocar (Xion, 5mm) and rigid laparoscope with angled optic (Xion, 5mm). Transfer in to the ampular part of oviducts of the recipient gilts was done with the laparoscopic tower (Xion, Germany). Approximately 10-20 cm from first incision in the caudo-lateral direction (left-right side, 45° from medial line) we done next two incision for trocars insertion to pass the atraumatic graspers or other instruments. Completeness of ovulation and right position of oviduct was checked on the screen of laparoscopic station. After grasping of oviduct by atraumatic grasper in the first third part from ovarium, through the second opposite port we introduced handmade laparoscopic needle (18G) and done a puncture of oviduct close to grasping by atraumatic grasper. Next, the catheter filled with MME (25-40 embryos) and cultivation medium was introduced through the laparoscopic needle into the oviduct lumen by visual control. After short resting period cca 2-3 minutes after MME deposition, we finished the procedure by laparoscopic instruments removing and abdomen cavity exsufflation. Skin incisions were closed by non-resorbable matherial stitches and covered by solutio Novikov.

**Tissue sampling for genotyping and primary cell isolation:**

Ear biopsies were taken from newborn animals, according to approved procedures under animal license regulation and stored at -20°C. For isolation of pig primary kidney cells from founder animals and sampling of tissue of untreated pigs, animals were sedated with ketamine 100mg/ml (Ursotamin®, Serumwerk Bernburg, Germany) and azaperone 40mg/ml (Stresnil®, Elanco Animal Health, Bad Homburg, Germany), according to the manufacturer’s specifications. Fully anesthetized animals were euthanized by intravenous injection of T61® (MSD Animal Health). Comprehensive tissue sampling of the whole heart was performed immediately after euthanasia.Pig primary kidney cells were isolated according to standard procedures (Richter et al., 2012). Tissue for molecular analysis was frozen on dry ice and stored at -80°C.

**Preparation and coating of AAV-Cre:**

Self-complementary rAAV pseudotype 2/9 particles encoding for CRE recombinase were produced using via triple transfection as described previously (Moretti et al., 2020). Briefly, HEK 293T cells were co-transfected with the transgene construct encoding iCRE open reading frame (AAV2.CMV.iCRE.WPRE.SV40pA), a packaging plasmid with AAV2 rep and AAV9 cap genes and the pAdDeltaF6 helper plasmid (Addgene plasmid # 112867, a gift from James M. Wilson) using PEI Max (Polysciences, Germany). Cells were harvested after 72 h and virus purification via iodixanol- gradient centrifugation, gravity-flow size-exclusion purification using Sephadex G100 SF resin (Sigma–Aldrich, Germany) was carried out. Virus was concentrated in phosphate buffered saline using Amicon Ultra-15 centrifugal filter units (Merck, Germany), and titered by qPCR (Aurnhammer 2011 doi: 10.1089/hgtb.2011.034. PMID: 22428977). PAMAM-Peg-Cys modification and coating was carried out as described (Bozoglu 2022 doi: 10.1002/advs.202103867): 18 µg of modified G2-PAMAM nanoparticles (Andrews ChemServices, USA) in Opti-MEM I (Thermo Fisher Scientific, USA) were added dropwise to 1 × 1014 vgs of rAAVs and incubated for 30 min at room temperature, and stored maximum 1 hour on ice before application.

**Virus application and tissue sampling:**

Pigs of huWT/poWT, or huWT/huWT assigned to virus-treatment or used as untreated control. AAV-Cre application was done at an age of 4–8 weeks (6.8-16.0kg body weight) after sedating pigs via intramuscular injection of ketamine (15–20 mg/kg body weight) and azaperone (2 mg/kg body weight). To prevent inflammatory reactions and support hemodynamic stability, either dexamethasone (2 mg/kg body weight) or methylprednisolone (10 mg/kg body weight) was administered intravenously. The viral vector was administered systemically through a catheter into the caudal auricular vein (vena auricularis caudalis). Animals were followed up for 3 weeks (weight 15-23kg) or 21-30 weeks (weight 73-94kg). At endpoint, pigs were premedicated (intramuscular ketamine 15–20 mg/kg, azaperone 2 mg/kg), followed by intratracheal intubation and intravenous anesthesia maintenance using propofol and continuous fentanyl infusion (2 µg/kg/h) and anesthesia monitoring during echocardiography and left ventricular catheterization were performed in a subset of animals. Additionally, electrophysiological studies were conducted in seven animals, including three virus-treated and four control pigs. Then, animals were euthanized by intracardiac injection of a saturated potassium chloride solution under deep anesthesia and heart, liver and blood samples were collected, immediately frozen on dry ice and stored at -80°C.

In four animals, representative myocardial samples were collected from the left anterior descending artery (LAD) region and from the circumflex artery (Cx) region. Additionally, liver samples and blood samples were collected for further analysis.

**Genotyping of piglets:**

Genomic DNA was isolated from tail biopsies by using the Easy DNA kit (Invitrogen) DNAeasy kit (Qiagen, Hildesheim, Germany), Macherey-Nagel Nucleospin (Macherey-Nagel, Düren, Germany) or Nexttec kits (Nexttec GmbH, Leverkusen, Germany). Genotyping of founder animals was done by endpoint PCR using HotStart Taq polymerase (Qiagen) and a standard protocol of 5min@95°C, 35x (20sec@95°C, 30sec8°C, 1min@72°C), 5min@72°C, 5min@4°C. Optional sequencing was done with amplification primers. Amplification with primers B2Mf-B2Mr (174bp) was utilized to verify DNA quality. poPLN1f-poPLN1r (1526bp) detected the pig PLN-WT allele. huPLNdoF-neokanR (527bp), neokanF-huPLNup1R (385bp) and huPLNR14f-huPLN1r (421bp) detected the modification between lox-sites and indicated the huPLN-WT genotype. huPLN2F-huPLN1r (630 vs 633bp) and poPLN1f-huPLNup1r (812bp) did not discriminate between the huPLN-WT and huPLN-R14del genotypes. All PCR were run under standard conditions, except poPLN1f-poPLN1r which required 2min elongation time. Genotyping of animals produced by breeding was done with primers GAPDHq1f-GAPDHq1r (351bp) to verify DNA quality, poPLNq3f-poPLNq3r (112bp) to determine the pig PLN allele, pln_qlf2-pln_qlr1 (116bp) to determine the huPLN-R14del allele and neokanF-huPLNup1r (385bp) to determine the human PLN-WT allele. All PCR were performed with HotStart Taq-polymerase, using a standard protocol of 5min@95°C, 35x (20sec@95°C, 20sec@58°C, 30sec@72°C), 5min@72°C, 5min@4°C.

**Genotyping of embryos:**

Embryos were conserved after zygote injection and in vitro culture. Parthenogenetic porcine embryos were generated using in vitro matured oocytes (Kurome et al., 2015; Yuan et al., 2017). Briefly, 43-47 hours after maturation, oocytes with expanded cumulus cells were denuded in hyaluronidase solution (1 mg/ml), and oocytes with an extruded first polar body were selected. The matured oocytes were washed twice in activation solution and then placed between two wire electrodes of a fusion chamber slide (CUY500G1, Nepa Gene, Japan) overlaid with activation solution. A single direct current pulse of 150 V/mm was applied for 100 µsec using an electrical pulsing machine (Multiporator, Eppendorf, Germany), followed by treatment with 5 µg/ml cytochalasin B for 3 h to suppress extrusion of the second polar body. Embryos were cultured in Porcine Zygote medium-5 (Yoshioka et al., 2008) in a humidiﬁed atmosphere of 5% CO2, 5% O2, and 90% N2 at 38.5 °C for 7 days. For isolation of embryonic genomic DNA, embryos were pretreated in a PBS solution containing 0.5mg/mL of Pronase for 30-60 sec until the zona pellucida was thickened. The reaction was stopped by transferring the embryos to PBS supplemented with 10% fetal calf serum. Embryos were then washed three times in serum-free PBS and individually placed in a lysis solution consisting of ddH₂O containing 2 M MgCl₂, 0.02 mg/mL Proteinase K, and 0.1% Triton X-100. Embryos were incubated in this solution for 1 hour at 37 °C, followed by 8 minutes at 99 °C, and finally held at 4 °C for 15 minutes. Samples were vortexed for 10-15 seconds and briefly centrifuged. 2µl of isolated DNA were used as a template in the 1st PCR. Taq 2xMaster Mix (NEB, #M0270L) was used following the manufacturer’s protocol, with primers at final concentration of 1 µM.

Low copy numbers in embryos required two subsequent rounds of PCR (nested PCR). For establishing assays, genomic DNA of pigs carrying poPLN-WT, and huPLN-WT and huPLN-R14del variants were diluted to 10 copies/µl. In addition, DNA from parthenogenetic embryos was used to check for efficient DNA isolation from embryos. 2µl of DNA were used as a template in the 1st PCR. Taq 2xMaster Mix (NEB, #M0270L) was used following the manufacturer’s protocol, with primers at final concentration of 1 µM.

1st PCR followed: 5min@95°C, 15x (30sec@95°C, 30sec@58°C, 1min@72°C), 5min@72°C and cooled to 4ºC. 2µl of the first nested PCR reaction was used as a template in the second nested PCR reaction.

2nd PCR followed: 2min@95°C, 35x (20sec@95°C, 20sec@58°C, 30sec@72°C), 5min@72°C and cooled to 4°C. For the PLN-R14del allele, the annealing was 64°C. PCR products were visualized on agarose gels and bands were excised for verification by Sanger sequencing.

Porcine WT PLN was detected by 1st primer pair poWT_ext-f – poWT_ext-r (690bp) and 2nd primer pair poWT_int-f – poWT_int-r (112bp).

Human full cassette was detected by 1st primer pair huWT_ext-f – huWT_ext-r (544bp) and 2nd primer pair huWT_int-f – huWT_int-r (193bp).

Human activated R14del was detected by 1st primer pair huR14del_ext-f – huR14del_ext-r (380bp) and 2nd primer pair huR14del_int-f – huR14del_int-r (116bp).

Porcine B2M reference site was by 1st primer pair poB2M_ext-f – poB2M_ext-r (451bp) and 2nd primer pair poB2M_int-f – poB2M_int-r (174bp).

**GM copy number quantification:**

Copy numbers of poPLN-WT, hu-PLN-WT, activated hu-PLN-R14del and neo copies were determined by qPCR. For this, serial dilutions of a verified high quality genomic DNA were used as standard curve. Presuming that 1 haploid mammalian genome weighs 6.7pg, DNA was diluted to 5000 copies perµl/cp/µl and then further diluted into 2500, 1250, 625, 312.5, 156.25, 78.12 and 39.0 cp/µl. DNA isolated from PLN litters was diluted to approximately 2500cp/µl. Copy number ratios were determined in founder animals, F1 offpring and Cre-treated animals as described for LoWA, using ng_qf6-ng_qr4 (221bp) and ush1c_qf1-ush1c_qr1 (90bp) as genomic reference sites, poPLN_q3f-poPLN_q3r (112bp) to detect pig PLN alleles, RESgDNA_q6f- RESgDNA_q6r (196bp) to specifically determine the huPLN-WT cassette, pln_qlf2-pln_qlr1 (116bp) to determine huPLN-R14del, and neo_prf1-neo_r32 (92bp) to detect the copy numbers of the neo-selection cassette. Alternatively, Cre-efficacy was determined by combining end-point PCR with restriction enzyme digestion. For this, a PCR product was amplified LoxP_F2-loxP_R3 primers (897bp in untreated copies, 894bp in floxed cassettes) with Q5 HF polymerase (NEB, Ipswich, MA, USA), purified on agarose and treated with *Sap*I (NEB) to selectively cut amplicons from untreated GMs into 725bp + 172bp bands. Quantification was done by densitometry on pictures after separation on agarose gel, using ImageJ.

For detection of virus genomes after AAV-Cre treament, qPCR was performed, using primers CreF-CreR and the FastStart Universal SYBR Green Master Mix (Roche, Basel, Switzerland) with 10min@95°C, 50x (15sec@95°C, 1min@60°C), followed by a 65°C-95°C melting curve protocol (0.5°C/min increment).

**Transcript analysis:**

Cryo-conserved tissue was powdered using hammer and anvil first and pestle and mortar afterwards. All instruments and samples were cooled in liquid nitrogen to avoid thawing of the samples during processing. Powdered tissue was transferred to a pre-cooled tube and stored at -80°C. RNA was isolated from powdered tissue samples using TRIzolTM (Invitrogen). Approximately 100mg of powdered tissue was grinded up in 1ml of Trizol by Polytron PT2500E (Kinematica, Luzern, Switzerland) in a pulsatile manner to avoid overheating. Further steps were carried out as suggested by the Trizol protocol and RNA was stored at -80°C. For cDNA synthesis, samples were treated first with DNase I (Invitrogen) to remove possible contamination with gDNA. Then, RNA was reversely transcribed into cDNA with SuperScriptTM III Reverse Transcriptase (Invitrogen).

All RT-PCR were run under standard conditions 5min@95°C, 35x (20sec@94°C, 20sec@58°C, 30sec@72°C), 5min@72°C, 5min@4°C, using HercII polymerase (Agilent). Primer pair GAPDHq1f-GAPDHq1r (181bp) was used as positive control, pln_rt2f-pln_rt2r (594bp) to detect poPLN transcripts and pln_rt3f-huPLN1r (567bp) to detect humanized PLN transcripts. Sequencing was done with amplification primers.

qPCR assays were performed on LightCycler96 (Roche), using FastStart Essential DNA Green Master (Roche Life Science, Basel, Switzerland) and Uracil-DNA glycosylase (Thermo Fisher Scientific). The standard cycler profile was 2min@50°C, 10min@95°C, 45x (10sec@95°C, 90sec@63°C), 10sec@95°C, 1min@60°C, ramp 1°C/sec to 97°C, 30sec@37°C. For quantification of PLN transcripts, primer pairs GAPDHq1f-GAPDHq1r (181bp), ACTBq1f-ACTBq1r (96bp), PPIAq1F-PPIAq1R (100bp), TBPq1f-TBPq1r (124bp) as HKG, pln_qef1-pln_qer1 (112bp) to detect humanized trancripts and pln_qef6-pln_qer6 (114bp) to detect pig transcripts were used. All assays were run under standard conditions; sequencing was done with amplification primers.

In an alterntative approach on PLN transcripts, same GAPDHq1f-GAPDHq1r (181bp) was used to normalize DELcDNA_q1f-DELcDNA_q1r (212bp) to specifically amplify R14del transcripts, REScDNA_q1f-REScDNA_q1r (210bp) to specifically amplify human WT transcripts and pln_qef8-pln_qer8 (181bp) to specifically amplify PLN transcripts. All assays were run under standard conditions; sequencing was done with amplification primers.

**Oligo & Gene Synthesis:**

Primers (with RE recognition sites underlined):

*Construct verification:*

- poPLN1f: 5´- AAGGAATGGCAAACATTTCA

- poPLN1r: 5´- GGAGTCAGTGGGCTATTTCA

-poPLN5s: 5´- CATCTTATTCCAGAAATGC

-poPLN6s: 5´- TGAGGTATTGGACTTTATC

-poPLNup1f: 5´- TGCAAATGGAAACGCTGTTC

-poPLNdo1r: 5´- CAAACTCACAGTCCCTCCAC

-huPLNup1r: 5´- CACACCATGACCGTCTCATT

-huPLNf2: 5´- TGCTGAGGAAGATGAATTAGTG

-huPLNdo1f: 5´- CCCAAGTCCAGACACACAAG

-neokanR: 5´- GTGGATGTGGAATGTGTGC

-neokanF: 5´- CACACCATGACCGTCTCATT

*LoWA - qPCR:*

- poPLN_q3f: 5´-GGTTTCACACTGATAGAGGGATT

- poPLN_q3r: 5´-ACCAGTAAAGCAGTTGTCTCAT

- ng_qf6: 5´-GAGGCTTCACTTGTTAAGGG

- ng_qr4: 5´-CTGAGATCAGGGTAGACATAC

- ush1c_q1f: 5'- CTTCTTGGAGCAGATGGGATAAA

- ush1c_q1r: 5'- GAATGCAGATTTCTGGTTTCCAC

*SCNT founder and breeding genotyping and copy number determination:*

- poPLN1f: 5´- AAGGAATGGCAAACATTTCA

- poPLN1r: 5´- GGAGTCAGTGGGCTATTTCA

- huPLNdo1f: 5´- CCCAAGTCCAGACACACAAG

- neokanR: 5´- GTGGATGTGGAATGTGTGC

- huPLN2F: 5´- TGCTGAGGAAGATGAATTAGTG

- huPLN1r: 5´- TGGGATAGAAATTTGTGAGCCA

- neokanF: 5´- CACACCATGACCGTCTCATT

- huPLNR14f: 5´- CACTCGCTCAGCTATAAGAAGA

- neoPf: 5´- CAGCTGTGCTCGACGTTGTC

- neoSr: 5´- GAGTCAACTAGTCCTCAGAAGAACTCGTCAAG

- GAPDHq1f: 5´- CAGAACATCATCCCTGCTTC

- GAPDHq1r: 5´- GCTTCACCACCTTCTTGATG

- huPLNup1rf: 5´- CACACCATGACCGTCTCATT

- pln_qlf2: 5´- GAACAGCCCAAAACAAGCTGC

- pln_qlr1: 5´- CAATAAAGACCCCAAGGATCCAT

- poPLN_q3f: 5´- GGTTTCACACTGATAGAGGGATT

- poPLN_q3r: 5´- ACCAGTAAAGCAGTTGTCTCAT

- RESgDNA_q6f: 5´- GGGAGGATTGGGAAGACAAT

- RESgDNA_q6r: 5´- CTGGTCACAAAAACATCACCA

- neo_prf1: 5´- CCATTGAACAAGATGGATTGCAC

- neo_r32: 5´- CATCAGAGCAGCCGATTGTCTGTTG

- CreF: 5´- GGTGCAAGCTGAACAACAGG

- CreR: 5´- AGCATTGGAGTCAGAAGGGC

- LoxP_F2: 5´- CCAAAACAAGCTGCCCCCTAAA

- LoxP_R3: 5´- TTAAGCTGATGTGGCAAGCTGC

*Zygote nested PCR genotyping:*

- poWT_ext-f: 5´- TCAACATAAGTGCTGCTAACAAAG

- poWT_ext-r: 5´- ACGTAGAAGGCGACATTAAACA

- poWT_int-f: 5´- GGTTTCACACTGATAGAGGGATT

- poWT_int-r: 5´- ACCAGTAAAGCAGTTGTCTCAT

- huWT_ext-f: 5´- CTCCCACTGTCCTTTCCTAATAA

- huWT_ext-r: 5´- GGAGTAATCCTCAGTGTCTTCC

- huWT_int-f: 5´- GGGAGGATTGGGAAGACAAT

- huWT_int-r: 5´- CTGGTCACAAAAACATCACCA

- huR14del_ext-f: 5´- CATCTTATTCCAGAAATGCTCAGAA

- huR14del_ext-r: 5´- ACCCTAGGCTGATTGATGTAAA

- huR14del_int-f: 5´- GAACAGCCCAAAACAAGCTGC

- huR14del_int-r: 5´- CAATAAAGACCCCAAGGATCCAT

- poB2M_ext-f: 5´- ATCCTCTGGCGTTTCATCTG

- poB2M_ext-r: 5´- GTGCTACTAGACGGAGCTTTAAT

- poB2M_int-f: 5´- CGGAAAGCCAAATTACCTGA

- poB2M_int-r: 5´- TCCACAGCGTTAGGAGTGAA

*Transcripts (RT-PCR, RT-qPCR):*

- GAPDHq1f: 5´- CAGAACATCATCCCTGCTTC

- GAPDHq1r: 5´- GCTTCACCACCTTCTTGATG

- TBPq1f: 5´- GATGGACGTTCGGTTTAGG

- TBPq1r: 5´- AGCAGCACAGTACGAGCAA

- PPIAq1f: 5´- CTGAAGCATACGGGTCCTGG

- PPIAq1r: 5´- CCAACCACTCAGTCTTGGCA

- ACTBq1f: 5´- AGCGCAAGTACTCCGTGTG

- ACTBq1r: 5´- CGGACTCATCGTACTCCTGCTT

- pln_rt2f: 5´- ACACCGATAAGACTTCATACAACT

- pln_rt2r: 5´- TGTAGGTTCTGATACCACTAGAGA

- pln_rt3f: 5’- CTGTGATCATCATAAACAGCCAAG

- huPLN1r: 5’- TGGGATAGAAATTTGTGAGCCA

- pln_qef1: 5’- GAAGAACAGAAGGGCAGAGATT

- pln_qer1: 5’- AAACCAGTGAGGTGAGTGTATC

- pln_qef6: 5’- GGAACAGAGGGAAAAGGGGTT

- pln_qer6: 5’- ACTGCCACCAGTAAAGCAGTT

- pln_qef8: 5’- ACGGTTTGCTAAAGTATGGTTAC

- pln_qer8: 5’- CTTTGCTCAAGAAATCCCTCTATC

- DELcDNA_q1f: 5´- CTTTCCAGCTAAACACCGATA

- DELcDNA_q1r: 5´- TTTCAATGGTTGAGGCTCTTAT

- REScDNA_q1f: 5´- TCCAGCTAAACACCGATAAGAC

- REScDNA_q1r: 5´- TCAATGGTTGAGGCTCTTCTT

*gRNAs (PAM underlined):*

- PLNg1: 5´-gtatctcaatagtctaTGtgTGG

- PLNg2: 5´-cacatagactattgagATacTGG

- PLNg3: 5´-catctagtcattctgaGAgaAGG

*Modification vector:*

5´- homologous arm 1-300

loxP-site 328-361

PLN rescue cassette 362-4260

*Including human PLN WT exon 2 869-3759*

*Including human PLN WT coding sequence 966-1124*

Neomycin resistance cassette 4266-5992

loxP-site 5993-6026

PLN rescue cassette 6033-9921

*Including human PLN WT exon 2 6533-9420*

*Including human PLN WT coding sequence 6630-6785*

3´-homologous arm 9928-10227

*Nsi*I (atgcat), *Nhe*I (gctagc), *BamH*I (ggatcc), *Avr*II (cctagg), *Pst*I (ctgcag), and *Spe*I (actagt) restriction enzyme sites are underlined.

1 gcttcagaaa atctatacta aaatctcaaa acatgtagat gtgaataaat gtaaactctt

61 caaatgcgct ttatttttac atcttattcc agaaatgctc agaaataaaa agaatatctc

121 tttgaaacag tatctaatgt catacttaaa tgcactcatt tctttttatt agattgctct

181 ggagccatta atacactaat gttcacaaca attatgctca tagagaaacg gtcttaatga

241 aactgtatgt aagaacttgc ctaagggaac agcccaaaac aagctgcccc ctaaactaaa

301 atgcatgaca ataaacgcta gctggcaATA ACTTCGTATA ATGTATGCTA TACGAAGTTA

361 Tgggatcctt ggggtcttta ttgagaagtt tggtgatgtt tttgtgacca gaaatatgct

421 ataggaactt aactcttgtt tacatcaatc agcctagggt aaaaatggtt ttgttatatg

481 ttgttttgcg taaagtcatg gtttccagga acttatggaa gacactgagg attactccaa

541 tacttgtagt aaatttggga gaaaaaggca aggactaaag ttactactcc taacacaaat

601 gagacggtca tggtgtgccc catcaaaaaa ggagagaaag agagacagac acatagaaac

661 acgtgcacat acacacacac acacacacac acacacacac acacagagag agagagagag

721 agagagagag agggagagag actatagaaa catgatgtta taaataacaa tagtgctgag

781 gaagatgaat tagtgtaaaa ttgtattttt tgttctgagg ataggttaca tagatgattc

841 taatccattt attattttta cattccaggc tacctaaaag aagacagtta tctcatattt

901 ggctgccagc tttttatctt tctctcgacc acttaaaact tcagacttcc tgtcctgctg

961 gtatcATGGA GAAAGTCCAA TACCTCACTC GCTCAGCTAT AAGAAGAGCC TCAACCATTG

1021 AAATGCCTCA ACAAGCACGT CAAAAGCTAC AGAATCTATT TATCAATTTC TGTCTCATCT

1081 TAATATGTCT CTTGCTGATC TGTATCATCG TGATGCTTCT CTGAagttct gctacaacct

1141 ctagatctgc agcttgccac atcagcttaa aatctgtcat cccatgcaga caggaaaaca

1201 atattgtata acagaccact tcctgagtag aagagtttct ttgtgaaaag gtcaagatta

1261 agactaaaac ttattgttac catatgtatt catctgttgg atcttgtaaa catgaaaagg

1321 gctttatttt caaaaattaa cttcaaaata agtgtataaa atgcaactgt tgatttcctc

1381 aacatggctc acaaatttct atcccaaatc ttttctgaag atgaagagtt tagttttaaa

1441 actgcactgc caacaagttc acttcatata taaagcatta tttttactct tttgaggtga

1501 atataattta tattacaatg gaaaagcttc tttaatacta agtatttttc aggtcttcac

1561 caagtatcaa agtaataaca caaatgaagt gtcattattc aaaatagtcc actgactcct

1621 cacatctgtt atcttattat aaagaactat ttgtagtaac tatcagaatc tacattctaa

1681 aacagaaatt gtattttttc tatgccacat taacatcttt taaagttgat gagaatcaag

1741 tatggaaaag taaggccata ctcttacata ataaaattcc ttttaagtaa ttttttcaaa

1801 gaatcacaga attctagtac atgtaggtaa atcataaatc tgttctaaga catatgatca

1861 acagatgaga actggtggtt aatatgtgac agtgagatta gtcatatcac taatatacta

1921 acaacagaat ctaatcttca tttaaggcac tgtagtgaat tatctgagct agagttacct

1981 agcttaccat actatatctt tggaatcatg aaaccttaag acttcagaat gattttgcag

2041 gttgtcttcc attccagcct aacatccaat gcaggcaagg aaaataaaag atttccagtg

2101 acagaaaaat atattatctc aagtattttt taaaaatata tgaattctct ctccaaatat

2161 taactaatta ttagattata ttttgaaatg aacttgttgg cccatctatt acatctacag

2221 ctgacccttg aacatggggg ttaggggagc tgacaattcg tgggtccgca aaatcttaac

2281 tacctaatag cctactattg accataaacc ttactgataa cataaacagt aaattaacac

2341 atattttgcg tgttatatgt attatacact atattcctac aataaagtaa gctagagaaa

2401 atgttattta gaaaatcata agaaagagaa aatatattta ctattcatta aatggaagtg

2461 ggtcaacata aaagtcttca ttctcattgt cttcacattg agtaggcaga ggaggagaaa

2521 gatggggagg aagagaaggc gttggtcttg cagtcttgtc ttaggggtgt ggggagtggg

2581 ggaaagaata ttcatgtata agtggaccct tgcaattcaa gcccttgttg ttcaagggtc

2641 aactgtaata ggatatagct atttttcttc ctctatcaac caaatggtaa gcatctattt

2701 tgtagtccac tctactgagc taaattatag atccagctat gctatttata attattttct

2761 tgatgaataa attttcaatt tctcctctga ccatttcaga acatcttcca ataactcata

2821 aaacaactga agtaaaattg agtgctggaa aatatattca ccaaactttg gtaatttaag

2881 ttgactaaag tttaaaatta agtctaaaat agtttacacc tatactgcat aatccaacaa

2941 ttttaatttc agttgaagac atgttactaa tataactatt attaaaagag tagaggatgt

3001 gtaattaacc atatcttcta aaacatggtt actaaaagaa tatgtaacat caatattgac

3061 cttggtttct tacacaagtg ttgctaactc aatagtgaag gagacactat taaattttct

3121 gaacccatga gagatactag agatggggag tggaaagtgt ttggttcagg gatatctgaa

3181 gaacagaagg gcagagattt cttaagtgac gcctcatcta caagctggaa attcctaaaa

3241 acaagtagaa agcttataaa caacaggtga tacactcacc tcactggttt tagtaaatta

3301 ccaatacaga aagtatccct agtcttaaaa acaagtggaa aatttgaact gattagtcat

3361 attcctttga ttacactgtt tgttacaata tttttctcag taaacagaaa taactaattt

3421 ttttgttctt cattctttga tagaaattaa aatcttattc tgtgaggatt acagaatact

3481 ataactcaaa ttataaagta gaataaactc tttaaataat tattcttcat cataaagtgt

3541 aaagaataag atataagaaa acaatttatt tttaaaattt aatatactaa atgctcaaat

3601 atgttctact atagaataag ttcttatctt aatttacagg gcactaaaaa caattttaaa

3661 atgcttaatg ttgcctttta tattttaatt ggttaagaat atatatttgt ttaatgcaaa

3721 tcagaatcac tatattaaaa tgaatgttct tgaaaactca gtggggctgc tctataatac

3781 acttacaatt gatactaacg ataaaacgct ctaattatag ttttaatttt ataggggttt

3841 ttttggtgac tttccccaaa taaaacaaaa tcaagacgcc caagtccaga cacacaagag

3901 ggcagacgta tataagataa caaattgcta ctacatagcg attatttatc ttttgattat

3961 ttttgagact tctggcaaag taggactata ataaattttc agaaaagatc tgctcttctg

4021 ctaagtaaca gcacacttca aaatgtccag aaattttatg ctaatattac atagaaaact

4081 tgacagatga aaaaagtgaa acacattact aattttattc attaaaacag gtatataaaa

4141 gtcctcttta actacctaat gaatgtgtca tatcctaata tagggagtgt catagtgttc

4201 acatctttga atatataaat tatctcaaac agttaaaaaa ttaaagccag aacagggtac

4261 actagcttgg ctgcaggtcg tcgaaattct accgggtagg ggaggcgctt ttcccaaggc

4321 agtctggagc atgcgcttta gcagccccgc tgggcacttg gcgctacaca agtggcctct

4381 ggcctcgcac acattccaca tccaccggta ggcgccaacc ggctccgttc tttggtggcc

4441 ccttcgcgcc accttctact cctcccctag tcaggaagtt cccccccgcc ccgcagctcg

4501 cgtcgtgcag gacgtgacaa atggaagtag cacgtctcac tagtctcgtg cagatggaca

4561 gcaccgctga gcaatggaag cgggtaggcc tttggggcag cggccaatag cagctttgct

4621 ccttcgcttt ctgggctcag aggctgggaa ggggtgggtc cgggggcggg ctcaggggcg

4681 ggctcagggg cggggcgggc gcccgaaggt cctccggagg cccggcattc tgcacgcttc

4741 aaaagcgcac gtctgccgcg ctgttctcct cttcctcatc tccgggcctt tcgacctgca

4801 gcctgttgac aattaatcat cggcatagta tatcggcata gtataatacg acaaggtgag

4861 gaactaaacc atgggatcgg ccattgaaca agatggattg cacgcaggtt ctccggccgc

4921 ttgggtggag aggctattcg gctatgactg ggcacaacag acaatcggct gctctgatgc

4981 cgccgtgttc cggctgtcag cgcaggggcg cccggttctt tttgtcaaga ccgacctgtc

5041 cggtgccctg aatgaactgc aggacgaggc agcgcggcta tcgtggctgg ccacgacggg

5101 cgttccttgc gcagctgtgc tcgacgttgt cactgaagcg ggaagggact ggctgctatt

5161 gggcgaagtg ccggggcagg atctcctgtc atctcacctt gctcctgccg agaaagtatc

5221 catcatggct gatgcaatgc ggcggctgca tacgcttgat ccggctacct gcccattcga

5281 ccaccaagcg aaacatcgca tcgagcgagc acgtactcgg atggaagccg gtcttgtcga

5341 tcaggatgat ctggacgaag agcatcaggg gctcgcgcca gccgaactgt tcgccaggct

5401 caaggcgcgc atgcccgacg gcgatgatct cgtcgtgacc catggcgatg cctgcttgcc

5461 gaatatcatg gtggaaaatg gccgcttttc tggattcatc gactgtggcc ggctgggtgt

5521 ggcggaccgc tatcaggaca tagcgttggc tacccgtgat attgctgaag agcttggcgg

5581 cgaatgggct gaccgcttcc tcgtgcttta cggtatcgcc gctcccgatt cgcagcgcat

5641 cgccttctat cgccttcttg acgagttctt ctgaggggat caattctcta gagctcgctg

5701 atcagcctcg actgtgcctt ctagttgcca gccatctgtt gtttgcccct cccccgtgcc

5761 ttccttgacc ctggaaggtg ccactcccac tgtcctttcc taataaaatg aggaaattgc

5821 atcgcattgt ctgagtaggt gtcattctat tctggggggt ggggtggggc aggacagcaa

5881 gggggaggat tgggaagaca atagcaggca tgctggggat gcggtgggct ctatggcttc

5941 tgaggcggaa agaaccagct ggggctcgac tagagcttgc ggaaccctta atATAACTTC

6001 GTATAATGTA TGCTATACGA AGTTATggat ccttggggtc tttattgaga agtttggtga

6061 tgtttttgtg accagaaata tgctatagga acttaactct tgtttacatc aatcagccta

6121 gggtaaaaat ggttttgtta tatgttgttt tgcgtaaagt catggtttcc aggaacttat

6181 ggaagacact gaggattact ccaatacttg tagtaaattt gggagaaaaa ggcaaggact

6241 aaagttacta ctcctaacac aaatgagacg gtcatggtgt gccccatcaa aaaaggagag

6301 aaagagagac agacacatag aaacacgtgc acatacacac acacacacac acacacacac

6361 acacacacag agagagagag agagagagag agagagggag agagactata gaaacatgat

6421 gttataaata acaatagtgc tgaggaagat gaattagtgt aaaattgtat tttttgttct

6481 gaggataggt tacatagatg attctaatcc atttattatt tttacattcc aggctaccta

6541 aaagaagaca gttatctcat atttggctgc cagcttttta tctttctctc gaccacttaa

6601 aacttcagac ttcctgtcct gctggtatcA TGGAGAAAGT CCAATACCTC ACTCGCTCAG

6661 CTATAAGA-- -GCCTCAACC ATTGAAATGC CTCAACAAGC ACGTCAAAAG CTACAGAATC

6721 TATTTATCAA TTTCTGTCTC ATCTTAATAT GTCTCTTGCT GATCTGTATC ATCGTGATGC

6781 TTCTCTGAag ttctgctaca acctctagat ctgcagcttg ccacatcagc ttaaaatctg

6841 tcatcccatg cagacaggaa aacaatattg tataacagac cacttcctga gtagaagagt

6901 ttctttgtga aaaggtcaag attaagacta aaacttattg ttaccatatg tattcatctg

6961 ttggatcttg taaacatgaa aagggcttta ttttcaaaaa ttaacttcaa aataagtgta

7021 taaaatgcaa ctgttgattt cctcaacatg gctcacaaat ttctatccca aatcttttct

7081 gaagatgaag agtttagttt taaaactgca ctgccaacaa gttcacttca tatataaagc

7141 attattttta ctcttttgag gtgaatataa tttatattac aatggaaaag cttctttaat

7201 actaagtatt tttcaggtct tcaccaagta tcaaagtaat aacacaaatg aagtgtcatt

7261 attcaaaata gtccactgac tcctcacatc tgttatctta ttataaagaa ctatttgtag

7321 taactatcag aatctacatt ctaaaacaga aattgtattt tttctatgcc acattaacat

7381 cttttaaagt tgatgagaat caagtatgga aaagtaaggc catactctta cataataaaa

7441 ttccttttaa gtaatttttt caaagaatca cagaattcta gtacatgtag gtaaatcata

7501 aatctgttct aagacatatg atcaacagat gagaactggt ggttaatatg tgacagtgag

7561 attagtcata tcactaatat actaacaaca gaatctaatc ttcatttaag gcactgtagt

7621 gaattatctg agctagagtt acctagctta ccatactata tctttggaat catgaaacct

7681 taagacttca gaatgatttt gcaggttgtc ttccattcca gcctaacatc caatgcaggc

7741 aaggaaaata aaagatttcc agtgacagaa aaatatatta tctcaagtat tttttaaaaa

7801 tatatgaatt ctctctccaa atattaacta attattagat tatattttga aatgaacttg

7861 ttggcccatc tattacatct acagctgacc cttgaacatg ggggttaggg gagctgacaa

7921 ttcgtgggtc cgcaaaatct taactaccta atagcctact attgaccata aaccttactg

7981 ataacataaa cagtaaatta acacatattt tgcgtgttat atgtattata cactatattc

8041 ctacaataaa gtaagctaga gaaaatgtta tttagaaaat cataagaaag agaaaatata

8101 tttactattc attaaatgga agtgggtcaa cataaaagtc ttcattctca ttgtcttcac

8161 attgagtagg cagaggagga gaaagatggg gaggaagaga aggcgttggt cttgcagtct

8221 tgtcttaggg gtgtggggag tgggggaaag aatattcatg tataagtgga cccttgcaat

8281 tcaagccctt gttgttcaag ggtcaactgt aataggatat agctattttt cttcctctat

8341 caaccaaatg gtaagcatct attttgtagt ccactctact gagctaaatt atagatccag

8401 ctatgctatt tataattatt ttcttgatga ataaattttc aatttctcct ctgaccattt

8461 cagaacatct tccaataact cataaaacaa ctgaagtaaa attgagtgct ggaaaatata

8521 ttcaccaaac tttggtaatt taagttgact aaagtttaaa attaagtcta aaatagttta

8581 cacctatact gcataatcca acaattttaa tttcagttga agacatgtta ctaatataac

8641 tattattaaa agagtagagg atgtgtaatt aaccatatct tctaaaacat ggttactaaa

8701 agaatatgta acatcaatat tgaccttggt ttcttacaca agtgttgcta actcaatagt

8761 gaaggagaca ctattaaatt ttctgaaccc atgagagata ctagagatgg ggagtggaaa

8821 gtgtttggtt cagggatatc tgaagaacag aagggcagag atttcttaag tgacgcctca

8881 tctacaagct ggaaattcct aaaaacaagt agaaagctta taaacaacag gtgatacact

8941 cacctcactg gttttagtaa attaccaata cagaaagtat ccctagtctt aaaaacaagt

9001 ggaaaatttg aactgattag tcatattcct ttgattacac tgtttgttac aatatttttc

9061 tcagtaaaca gaaataacta atttttttgt tcttcattct ttgatagaaa ttaaaatctt

9121 attctgtgag gattacagaa tactataact caaattataa agtagaataa actctttaaa

9181 taattattct tcatcataaa gtgtaaagaa taagatataa gaaaacaatt tatttttaaa

9241 atttaatata ctaaatgctc aaatatgttc tactatagaa taagttctta tcttaattta

9301 cagggcacta aaaacaattt taaaatgctt aatgttgcct tttatatttt aattggttaa

9361 gaatatatat ttgtttaatg caaatcagaa tcactatatt aaaatgaatg ttcttgaaaa

9421 ctcagtgggg ctgctctata atacacttac aattgatact aacgataaaa cgctctaatt

9481 atagttttaa ttttataggg gtttttttgg tgactttccc caaataaaac aaaatcaaga

9541 cgcccaagtc cagacacaca agagggcaga cgtatataag ataacaaatt gctactacat

9601 agcgattatt tatcttttga ttatttttga gacttctggc aaagtaggac tataataaat

9661 tttcagaaaa gatctgctct tctgctaagt aacagcacac ttcaaaatgt ccagaaattt

9721 tatgctaata ttacatagaa aacttgacag atgaaaaaag tgaaacacat tactaatttt

9781 attcattaaa acaggtatat aaaagtcctc tttaactacc taatgaatgt gtcatatcct

9841 aatataggga gtgtcatagt gttcacatct ttgaatatat aaattatctc aaacagttaa

9901 aaaattaaag ccagaacagg gtacactagt aaaaataaaa ataagaaaac tttcttttca

9961 gaggatgtag tagtatacat aaactaccct cacattaaaa atagaacctt ttcaaattga

10021 aactacaatg aggtaccaac tcacaccagt cagaatggcc atcattagta aatccacaaa

10081 aaataaatgc tgaagagggg gtggagaaaa gggaaccctc ctaaactgct ggtgggaatg

10141 taaattggta taactactat ggaaagaagt atggaggttc ctcagaaaat taaatataga

10201 actaccctat gatccagcaa tcccactcct

**References**

Andersson, R., Gebhard, C., Miguel-Escalada, I., Hoof, I., Bornholdt, J., Boyd, M., Chen, Y., Zhao, X., Schmidl, C., Suzuki, T.*, et al.* (2014). An atlas of active enhancers across human cell types and tissues. Nature *507*, 455-461.

Auch, H., Klymiuk, N., and Runa-Vochozkova, P. (2022). Modifying Bacterial Artificial Chromosomes for Extended Genome Modification. Methods Mol Biol *2495*, 67-90.

Brudno, M., Steinkamp, R., and Morgenstern, B. (2004). The CHAOS/DIALIGN WWW server for multiple alignment of genomic sequences. Nucleic Acids Res *32*, W41-44.

Ferretti, V., Poitras, C., Bergeron, D., Coulombe, B., Robert, F., and Blanchette, M. (2007). PReMod: a database of genome-wide mammalian cis-regulatory module predictions. Nucleic Acids Res *35*, D122-126.

Fishilevich, S., Nudel, R., Rappaport, N., Hadar, R., Plaschkes, I., Iny Stein, T., Rosen, N., Kohn, A., Twik, M., Safran, M.*, et al.* (2017). GeneHancer: genome-wide integration of enhancers and target genes in GeneCards. Database (Oxford) *2017*.

Giresi, P.G., Kim, J., McDaniell, R.M., Iyer, V.R., and Lieb, J.D. (2007). FAIRE (Formaldehyde-Assisted Isolation of Regulatory Elements) isolates active regulatory elements from human chromatin. Genome Res *17*, 877-885.

Grotz, S., Schafer, J., Wunderlich, K.A., Ellederova, Z., Auch, H., Bahr, A., Runa-Vochozkova, P., Fadl, J., Arnold, V., Ardan, T.*, et al.* (2022). Early disruption of photoreceptor cell architecture and loss of vision in a humanized pig model of usher syndromes. EMBO Mol Med *14*, e14817.

Klymiuk, N., Bocker, W., Schonitzer, V., Bahr, A., Radic, T., Frohlich, T., Wunsch, A., Kessler, B., Kurome, M., Schilling, E.*, et al.* (2012). First inducible transgene expression in porcine large animal models. FASEB J *26*, 1086-1099.

Kurome, M., Kessler, B., Wuensch, A., Nagashima, H., and Wolf, E. (2015). Nuclear transfer and transgenesis in the pig. Methods Mol Biol *1222*, 37-59.

Moretti, A., Fonteyne, L., Giesert, F., Hoppmann, P., Meier, A.B., Bozoglu, T., Baehr, A., Schneider, C.M., Sinnecker, D., Klett, K.*, et al.* (2020). Somatic gene editing ameliorates skeletal and cardiac muscle failure in pig and human models of Duchenne muscular dystrophy. Nat Med *26*, 207-214.

Richter, A., Kurome, M., Kessler, B., Zakhartchenko, V., Klymiuk, N., Nagashima, H., Wolf, E., and Wuensch, A. (2012). Potential of primary kidney cells for somatic cell nuclear transfer mediated transgenesis in pig. BMC Biotechnol *12*, 84.

Thurman, R.E., Rynes, E., Humbert, R., Vierstra, J., Maurano, M.T., Haugen, E., Sheffield, N.C., Stergachis, A.B., Wang, H., Vernot, B.*, et al.* (2012). The accessible chromatin landscape of the human genome. Nature *489*, 75-82.

Vochozkova, P., Simmet, K., Jemiller, E.M., Wunsch, A., and Klymiuk, N. (2019). Gene Editing in Primary Cells of Cattle and Pig. Methods Mol Biol *1961*, 271-289.

Wang, J., Zhuang, J., Iyer, S., Lin, X.Y., Greven, M.C., Kim, B.H., Moore, J., Pierce, B.G., Dong, X., Virgil, D.*, et al.* (2013). Factorbook.org: a Wiki-based database for transcription factor-binding data generated by the ENCODE consortium. Nucleic Acids Res *41*, D171-176.

Waterhouse, A.M., Procter, J.B., Martin, D.M., Clamp, M., and Barton, G.J. (2009). Jalview Version 2--a multiple sequence alignment editor and analysis workbench. Bioinformatics *25*, 1189-1191.

Yoshioka, K., Suzuki, C., and Onishi, A. (2008). Defined system for in vitro production of porcine embryos using a single basic medium. J Reprod Dev *54*, 208-213.

Yuan, Y., Spate, L.D., Redel, B.K., Tian, Y., Zhou, J., Prather, R.S., and Roberts, R.M. (2017). Quadrupling efficiency in production of genetically modified pigs through improved oocyte maturation. Proc Natl Acad Sci U S A *114*, E5796-E5804.
